# Supplementary material
Source: Springer Nature journal article supplement (https://www.springermedizin.de/resource/supplementary/13075_2009_2824_MOESM1_ESM.pdf/9692968)
Supplement: MOESM1 [file 9692968]

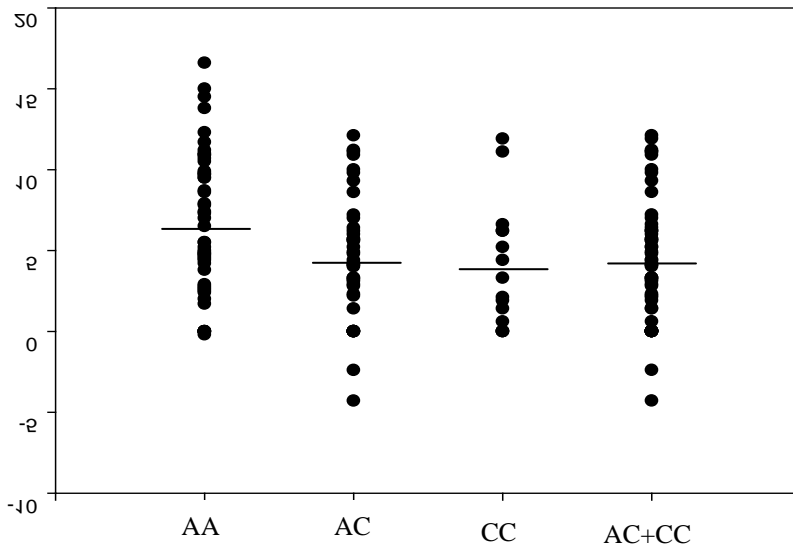

| <i>Genotype</i> | No. Patients | FMD % $\pm$ Std. Deviation | P value            |                   |
|-----------------|--------------|----------------------------|--------------------|-------------------|
|                 |              |                            | uncorrected        | corrected         |
| AA              | 51           | 6.5 $\pm$ 4.4              |                    |                   |
| AC              | 42           | 4.5 $\pm$ 3.9              | 0.02*              | 0.03*             |
| CC              | 15           | 3.9 $\pm$ 3.8              |                    |                   |
| AC+CC           | 57           | 4.3 $\pm$ 3.9              | 0.005 <sup>¶</sup> | 0.01 <sup>¶</sup> |

\* Genotype distribution.

<sup>¶</sup> *MTHF* 1298AC plus *MTHF* 1298CC compared to *MTHF* 1298AA genotype.
